# Supplementary material for: Heterogeneity of oligodendrocyte progenitor cells in adult human brain
Source: PubMed Central journal article supplement — Ann Clin Transl Neurol. 2014 Mar 26;1(4):272–83. doi: 10.1002/acn3.55 (PMC4292744; doi:10.1002/acn3.55), 2014-03-26
Supplement: acn30001-0272-sd1.pdf [file acn30001-0272-sd1.pdf]

## Supplemental tables: Basis for the selection of miRNAs panel for this study

### 1. Top differentially expressed miRNAs at early glial precursor stage transitions in cells derived from human embryonic stem cells (hESCs) (1)

miRNAs upregulated during transition from neural progenitors (expressing A2B5 and Sox10) to glial precursor stage (expressing Olig1, PDGFR $\alpha$  and NG2 markers)

| miRNA names | miRBase accessions |
|-------------|--------------------|
| miR-181a-5p | MIMAT0000256       |
| miR-199a-5p | MIMAT0000231       |
| miR-214-3p  | MIMAT0000271       |

miRNAs upregulated during transition from glial precursor (expressing Olig1, PDGFR $\alpha$  and NG2 markers) to early oligodendrocyte progenitor stage (expressing O4 marker)

| miRNA names | miRBase accessions |
|-------------|--------------------|
| miR-22-3p   | MIMAT0000077       |
| miR-34a-5p  | MIMAT0000255       |
| miR-125b-5p | MIMAT0000423       |
| miR-184     | MIMAT0000454       |
| miR-490-3p  | MIMAT0002806       |

miRNAs downregulated during transition from glial precursor (expressing Olig1, PDGFR $\alpha$  and NG2 markers) to early oligodendrocyte progenitor stage (expressing O4 marker)

| miRNA names | miRBase accessions |
|-------------|--------------------|
| miR-483-5p  | MIMAT0004761       |
| miR-617     | MIMAT0003286       |

### 2. Top differentially expressed miRNAs during the transition from the oligodendrocyte progenitor stage (expressing A2B5) to premyelinating oligodendrocytes (expressing GalC) in rat postnatal day7 derived cells (2)

| miRNA names | miRBase accessions |
|-------------|--------------------|
| miR-99a-5p  | MIMAT0000097       |
| miR-100-5p  | MIMAT0000098       |
| miR-145-5p  | MIMAT0000437       |
| miR-449a    | MIMAT0001541       |

### 3. MiRNAs included in our study that have already been functionally characterized as being important for the differentiation of rodent OPCs are listed below.

| miRNA names | miRBase accessions | mRNA targets                             | Reference (PMIDs)  |
|-------------|--------------------|------------------------------------------|--------------------|
| miR-9-5p    | MIMAT0000441       | PMP22                                    | 18987208           |
| miR-23a-3p  | MIMAT0000078       | Lamin B1                                 | 19259393           |
| miR-219a-5p | MIMAT0000276       | PDGFRalpha, Sox6, FoxJ3, ZFP238 and Hes5 | 20223197, 20223198 |
| miR-338-5p  | MIMAT0004701       | Sox6 and Hes5                            | 20223198           |

### 4. Other miRNAs included in our study

| miRNA names   | miRBase accessions | Reference (PMIDs)                                                     |
|---------------|--------------------|-----------------------------------------------------------------------|
| miR-155-5p    | MIMAT0000646       | Inflammation related miR; highly expressed in human glial cells (3-5) |
| miR-219a-2-3p | MIMAT0004675       | A miRNA already reported to be detected in human OL lineage cells (6) |

## References

1. Letzen BS, Liu C, Thakor NV, et al.: MicroRNA expression profiling of oligodendrocyte differentiation from human embryonic stem cells. *PLoS One*. 2010, 5:e10480.
2. Lau P, Verrier JD, Nielsen JA, et al.: Identification of dynamically regulated microRNA and mRNA networks in developing oligodendrocytes. *J Neurosci*. 2008, 28:11720-11730.
3. Leng RX, Pan HF, Qin WZ, Chen GM, Ye DQ: Role of microRNA-155 in autoimmunity. *Cytokine Growth Factor Rev*. 2011, 22:141-147.
4. Murugaiyan G, Beynon V, Mittal A, Joller N, Weiner HL: Silencing microRNA-155 ameliorates experimental autoimmune encephalomyelitis. *J Immunol*. 2011, 187:2213-2221.
5. Tarassishin L, Loudig O, Bauman A, et al.: Interferon regulatory factor 3 inhibits astrocyte inflammatory gene expression through suppression of the proinflammatory miR-155 and miR-155\*. *Glia*. 2011, 59:1911-1922.
6. de Faria O, Jr., Cui QL, Bin JM, et al.: Regulation of miRNA 219 and miRNA Clusters 338 and 17-92 in Oligodendrocytes. *Front Genet*. 2012, 3:46.
